# Supplementary material
Source: MDPI journal article supplement (https://www.mdpi.com/2073-4344/11/8/990)
Supplement: s1 [file s1]

# Supplementary Materials

## Spectroscopic Analyses of Changes in Photocatalytic and Catalytic Activities of Mn- and Ni-ion Doped and Base-treated Reduced Graphene Oxide

Hangil Lee<sup>1</sup>, Hyun Sung Kim<sup>2,\*</sup>

<sup>1</sup> Department of Chemistry, Sookmyung Women's University, Seoul 04310, Korea; easyscan@sookmyung.ac.kr (H.L.)

<sup>2</sup> Department of Chemistry, Pukyong National University, Busan 48513, Korea; kimhs75@pknu.ac.kr (H.S.K.)

\* Correspondence: kimhs75@pknu.ac.kr; Tel.: +82-51-629-5596 (H.S.K.)

S-1.

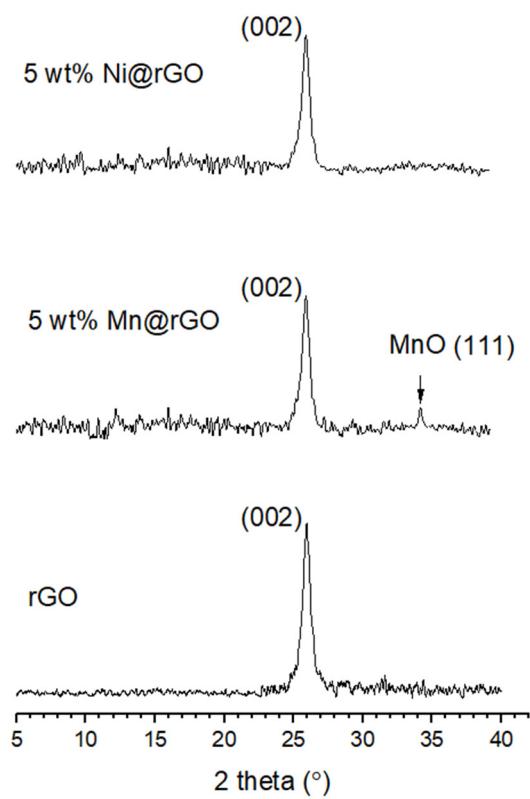

**Figure S1.** XRD patterns of (a) rGO, (b) 5 wt% Mn@rGO, and (c) 5 wt% Ni@rGO as indicated.

S-2.

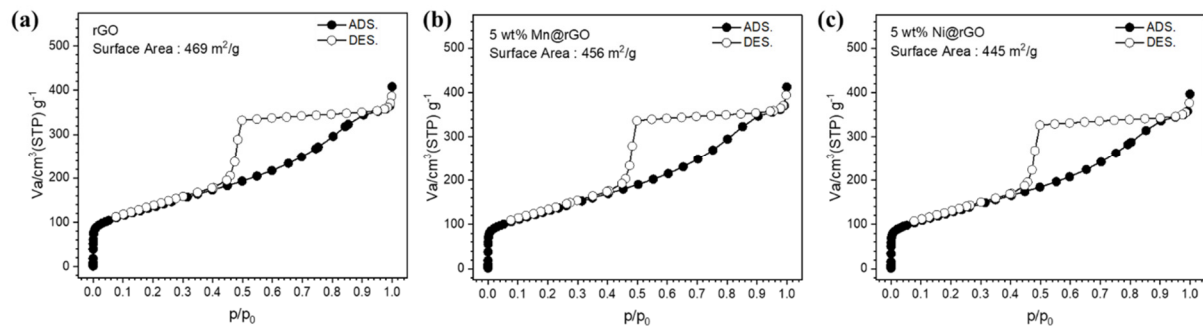

**Figure S2.** N<sub>2</sub> adsorption and desorption isotherm plots and surface area values of (a) rGO, (b) 5 wt% Mn@rGO, and (c) 5 wt% Ni@rGO as indicated.
